**Title:** Increased Muscle Tone from High Dose Alfentanil is a Peripheral Effect  
**Author:** K.C. Huang, M.D.  
**Affiliation:** Dept. of Anesthesiology, Medical College of Virginia, Richmond, VA, 23296

**Introduction**

Alfentanil, when administered in high doses, has been described to cause the "wooden chest syndrome". This phenomenon is thought to be a CNS mediated process. While administering high dose alfentanil to patients undergoing vaginal hysterectomy and monitoring train of four (TOF) responses we noted that the TOF increased as the alfentanil infusion started. We suspected that the increased TOF is a peripheral response and conducted the following study.

**Methods**

The study protocol was approved by the Committee on the Conduct of Human Research and informed consent was obtained from patients (ASA I or II). The patients were not pre-medicated. In addition to the usual monitors, integrated EMG monitors (Puritan Bennett NMT 221) were applied to both arms. The serial outputs of the NMT monitors were linked to two IBM/PC compatible computers that display T1 and T4 as two separate histograms. The data was also recorded on two disk files for further processing. An intravenous line was started in one arm. The opposite arm had two blood pressure cuffs applied, one for an automatic non-invasive device and the other for manual inflation. Once the baseline blood pressure was obtained, the manual cuff was inflated to 50mmHg above the systolic pressure. Alfentanil infusion (120ug/kg) was then

begun. The EMG response to a TOF stimulation was elicited every 20 seconds. When the alfentanil bolus infusion was complete, Vecuronium (0.08mg/kg) was administered to facilitate endotracheal intubation.

**Results**

The cuffed arm showed no change in TOF with Alfentanil infusion. The response of the uncuffed arm demonstrated a steady rise in TOF up to 30% above the baseline values. The same pattern was observed in all the study subjects.

**Discussion**

Our results showed that the EMG response in the arm that did not receive alfentanil had a normal TOF response and the arm with large amounts of alfentanil had an increased TOF response until a muscle relaxant is administered. We conclude that this phenomenon is a result of the action of alfentanil on the neuromuscular junction and is not mediated in the central nervous system since we did not observe any changes in TOF in the cuffed arm.



**COMPARATIVE EFFECTS OF RYANODINE-HALOETHANE ON THE RESTING TENSION OF MUSCLE IN NORMAL PATIENTS AND PATIENTS SUSCEPTIBLE TO MALIGNANT HYPERTHERMIA**

P.J. ADNET MD, B.A. BRITT MD, W. FRODIS BSc, E. SCOTT, MSc

Affiliation : Departments of Anesthesia, Univ. Lille 59037 Lille, France and Malignant hyperthermia Investigation Unit, Univ. Toronto, Ontario, Canada

**Introduction :** It has been suggested that a defect in the Ca<sup>2+</sup> release channels (CRC) from the sarcoplasmic reticulum (SR) might be the basic defect in Malignant Hyperthermia (MH) (1). These CRC may be activated by either halothane (H) or μM concentrations of ryanodine (R) (2). This in vitro study has compared the effects of R with H on human MH susceptible muscle and normal muscle.

**Methods :** "Five" MH susceptible patients (MHS) and 8 MH non susceptible patients (MHN) were investigated with informed consent and approval by the Research Committee (Univ. of Toronto). The contracture methods were previously described for the MH diagnostic procedures (3). Additional muscle strips were tested with 1 % H alone and 0.1 μM R in the presence of 1 % H. Statistical analysis was performed using student's t test.

**Results :** (Table I) : No contracture was observed with 1 % H alone in the 2 groups. A 30 min exposure to R in the presence of H induced a significant contracture of the MHS muscle strips. In contrast, no significant contracture was observed in normal muscle.

**Discussion :** exposure to R + H enables human MHS muscle to be distinguished from normal muscle. These results indicate that the CRC from SR might be involved in the MH defect. However, the extremely slow effects of R indicate that the R + H contracture testing probably cannot help the in vitro determination of MH susceptibility.

**references :**

- 1) J. Biol. C. Hem. 264 / 1715-1722, 1988
- 2) Nature 331 : 314-316, 1988
- 3) Anesth. Analg. 69 : 511-515, 1989

| Patients | N | 1 % H | 1 % H + 0.1 MR |
|----------|---|-------|----------------|
| MHN      | 8 | 0     | 0.06 ± 0.07    |
| MHS      | 5 | 0     | 1.10 ± 0.45*   |

Table I : changes in tension (g) with 1 % H + 1 μMR on MHS and MHN muscle strips. Values are means (±SE)

\* P < 0.05 compared with MHN
